# Supplementary material for: Increased Abundance of Plasmacytoid Dendritic Cells and Interferon-Alpha Induces Plasma Cell Differentiation in Patients of IgA Nephropathy
Source: Hindawi journal article supplement (doi:10.1155/2017/4532409), 2017-01-01

**A**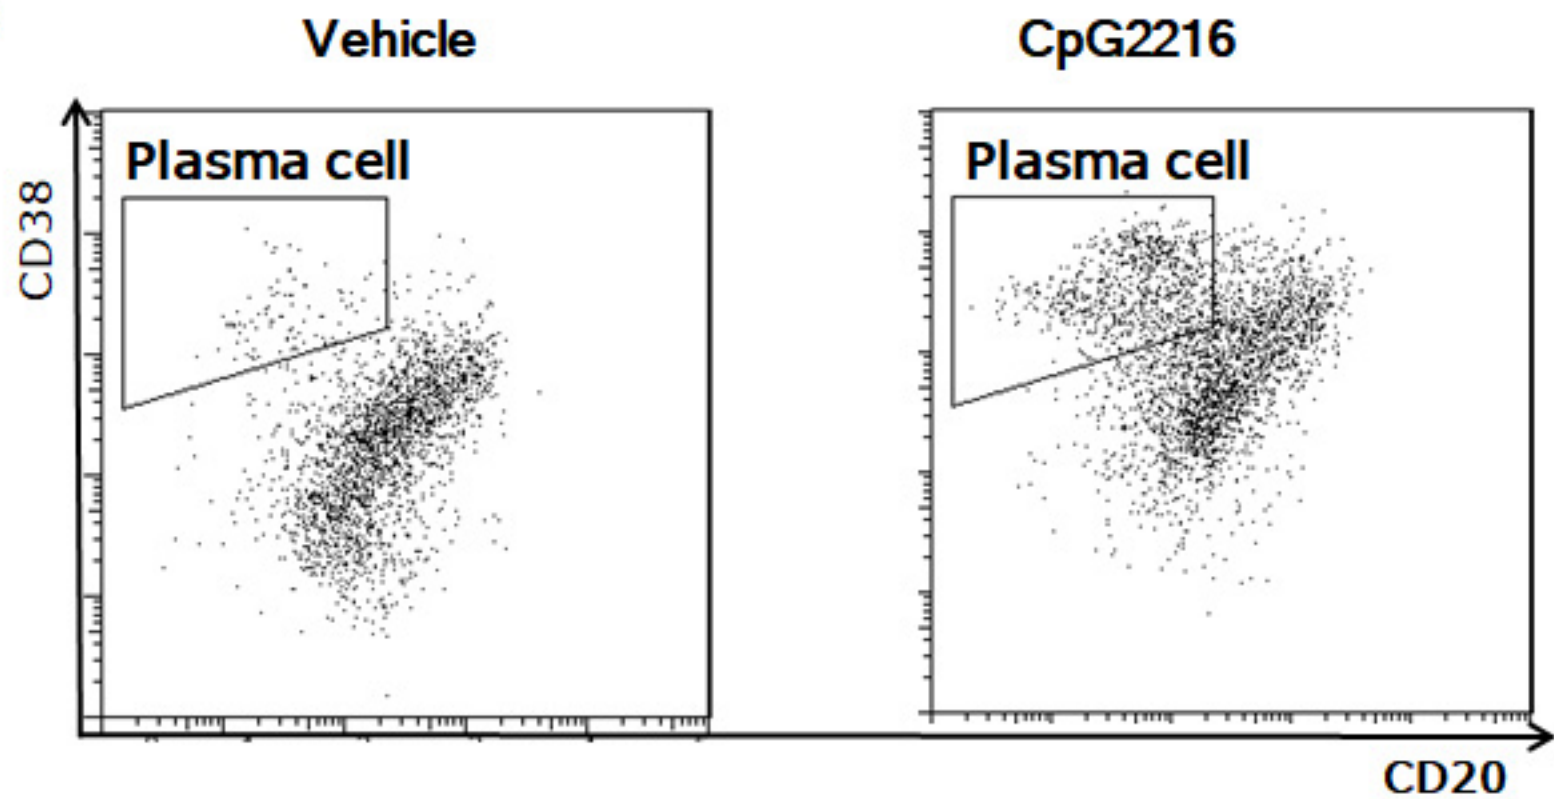**B**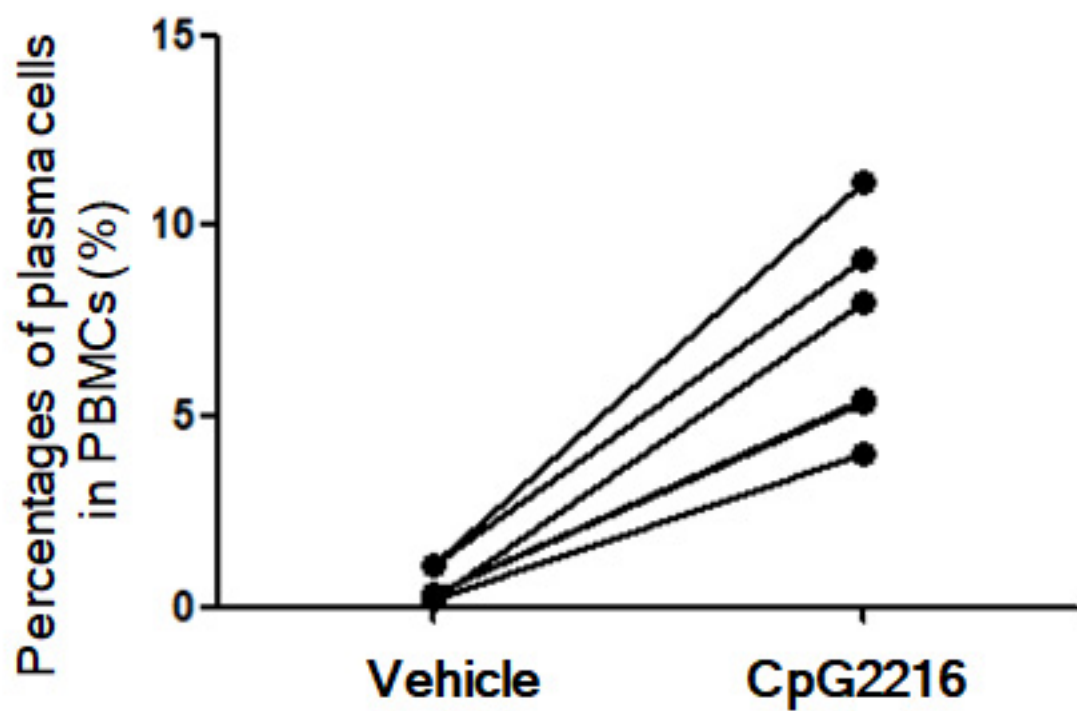

Supplement: f3 [file 4532409.f3.pdf]
